# Supplementary material
Source: Springer Nature journal article supplement (https://www.springermedizin.de/resource/supplementary/12887_2014_1184_MOESM1_ESM.pdf/9476708)
Supplement: MOESM1 [file 9476708]

Children assigned to a personal number in the two data collection periods  
Include newborn, adopted, and foster children  
Attending recruitment (n=7113)

Lost to follow-up (n=1986)  
Adoption and foster child (n=28)  
Address unknown (n=43)  
Not returned questionnaire (n=1915)

Data available (n=5127)

Unknown time for introduction to solid food (n=624)  
Missing information (n=564)  
Unable to classify (n=60)

Study population (n=4503)
